# Supplementary material
Source: PubMed Central journal article supplement (PMC5891426)
Supplement: EMBR-19-e44981-s001.pdf [file EMBR-19-e44981-s001.pdf]

**Appendix for:**

**PINK1 autophosphorylation is required for ubiquitin recognition**

**Shafqat Rasool<sup>1,2</sup>, Naoto Soya<sup>3,#</sup>, Luc Truong<sup>1,#</sup>, Nathalie Croteau<sup>1</sup>, Gergely L Lukacs<sup>2,3</sup> & Jean-François Trempe<sup>1,\*</sup>**

**Table of Content**

**Appendix Figure S1 - Enzyme kinetics and phosphorylation assays with PD mutants.**

**Appendix Figure S2 - Full TROSY NMR for GST and GST-TcPINK1 D337N titrations.**

**Appendix Figure S3 - Intact mass spectrometry analysis of mono Ub and Ub<sub>2</sub> phosphorylation.**

**Appendix Figure S4 - Purification of CIP-treated TcPINK1.**

**Appendix Figure S5 - Phosphorylation analysis of TcPINK1 WT and mutants.**

**Appendix Figure S6 - NMR competition assays of TcPINK1 mutants with <sup>15</sup>N-SH3 for Ubl binding.**

**Appendix Figure S7- Immunoblots for the experiments with U2OS cell lines**

**Appendix Figure S8 - SAXS analysis and model fitting of TcPINK1<sup>121-570</sup>.**

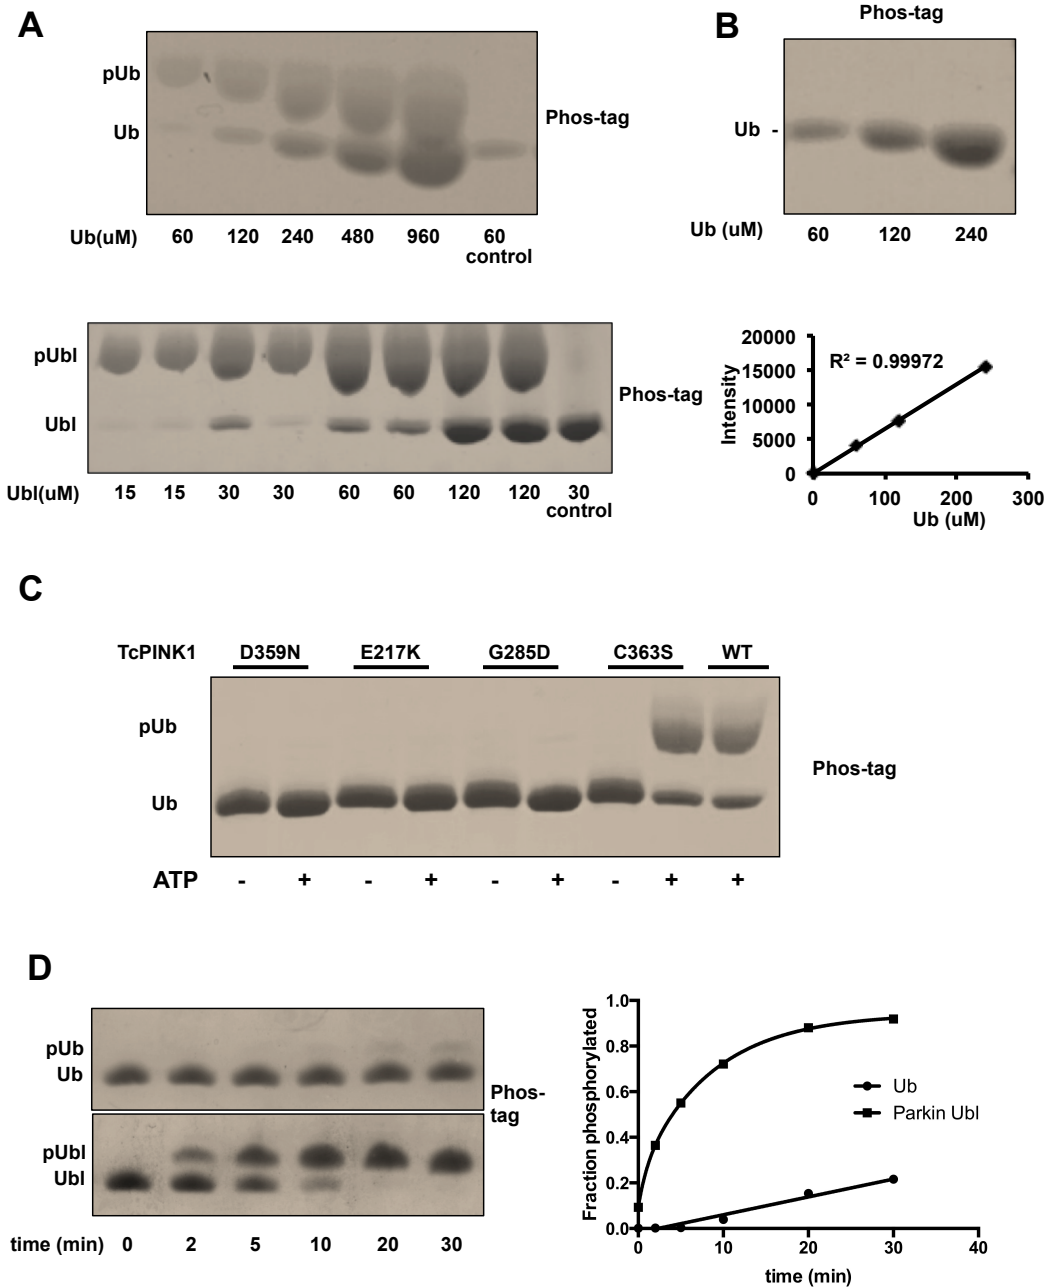

**Appendix Figure S1 - Enzyme kinetics and phosphorylation assays with PD mutants.**

**A** Phosphorylation assays with different concentrations of Ub and Parkin Ubl domain were conducted for 5 min and analyzed using phos-tag gels corresponding to the kinetics data shown in Fig 1A. Only one of the reaction sets for Ub is shown in top panel.

**B** (Above) Phos-tag gel loaded with different concentrations of Ub and (below) the band intensities analyzed graphically. The  $R^2$  value represents the fit of the intensities to the linear line.

**C** Phosphorylation of Ub by PD mutants of PINK1. 30 min kinase assays were conducted with 2.5  $\mu$ M GST-TcPINK1 (WT or mutant) and 120  $\mu$ M His-Ub observed and loaded on phos-tag gels.

**D** (Left) Phos-tag gels and (right) graphical analysis of time course phosphorylation experiments conducted with 30  $\mu$ M Parkin Ubl or Ub and 0.2  $\mu$ M Full-length TcPINK1.

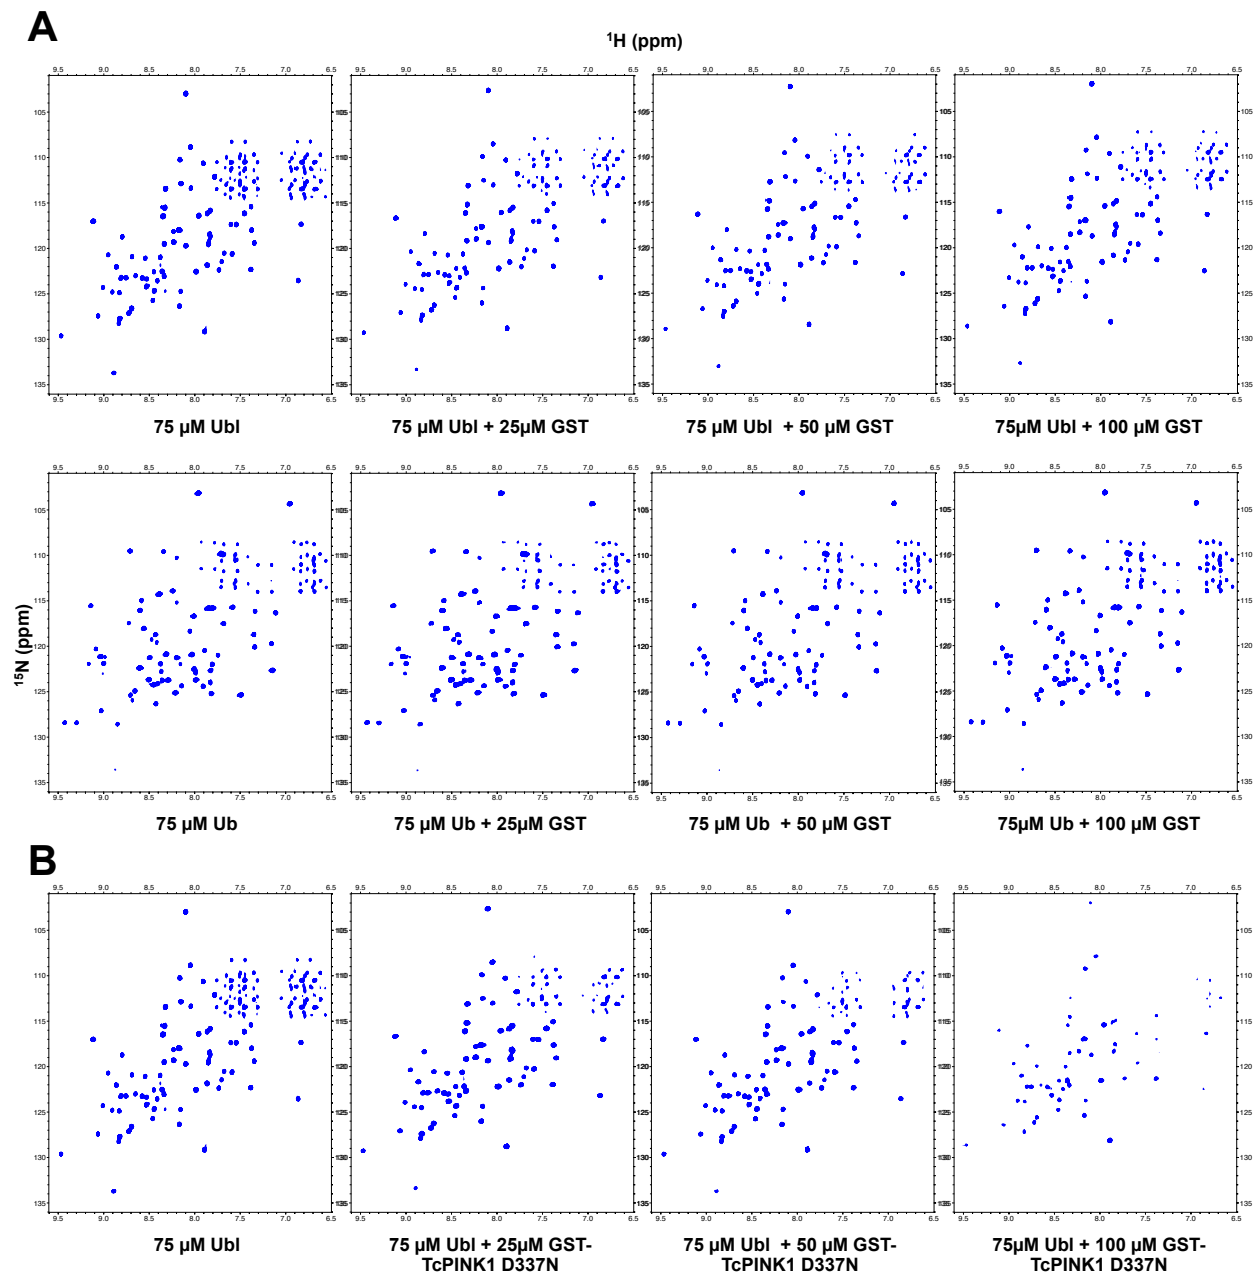

**Appendix Figure S2 - Full TROSY NMR for GST and GST-TcPINK1 D337N titrations.**

**A** Full  $^1\text{H}$ - $^{15}\text{N}$  TROSY NMR spectra of  $^2\text{H}$ ,  $^{15}\text{N}$ -labeled Ubl or Ub with different concentrations of GST.

**B** Full  $^1\text{H}$ - $^{15}\text{N}$  TROSY NMR spectra of  $^2\text{H}$ ,  $^{15}\text{N}$ -labeled Ubl with different concentrations of GST-TcPINK1 D337N.

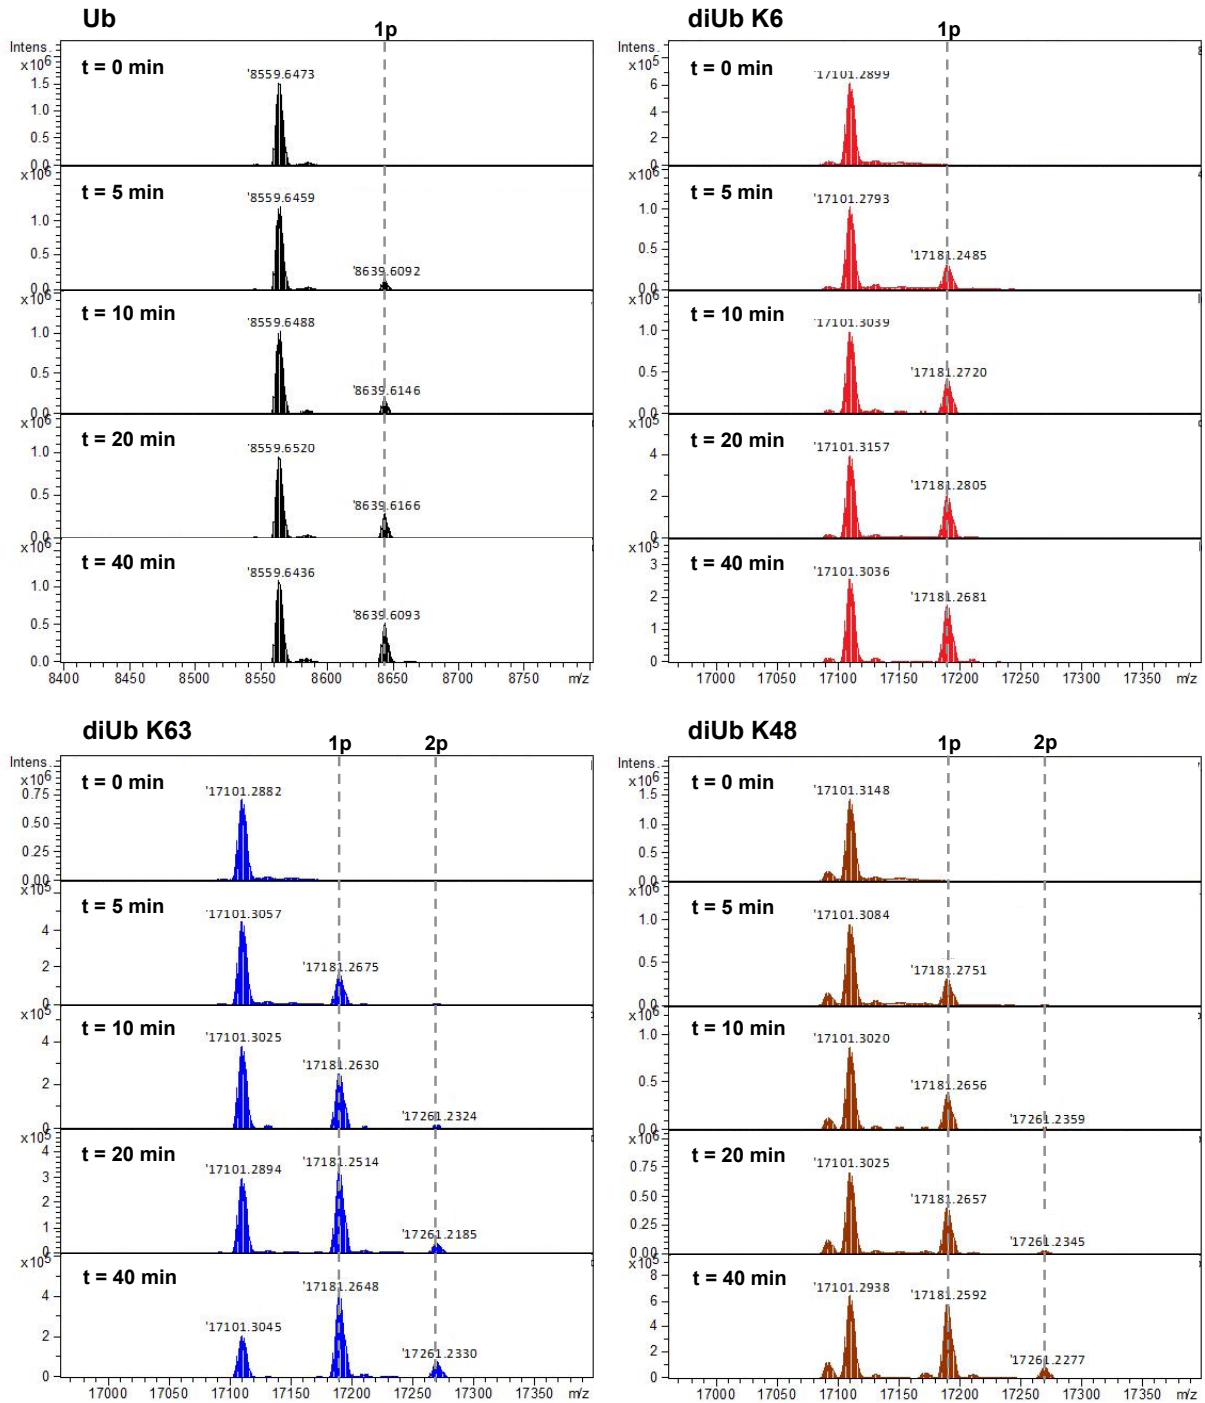

**Appendix Figure S3 - Intact mass spectrometry analysis of mono Ub and Ub<sub>2</sub> phosphorylation.**

Intact mass spectra of the time course phosphorylation experiments of mono and Ub<sub>2</sub> (K6-, K48- and K63-linked) corresponding to Figure 1E. The masses shown on the figures represent the monoisotopic masses, calculated from the isotopomer peaks.

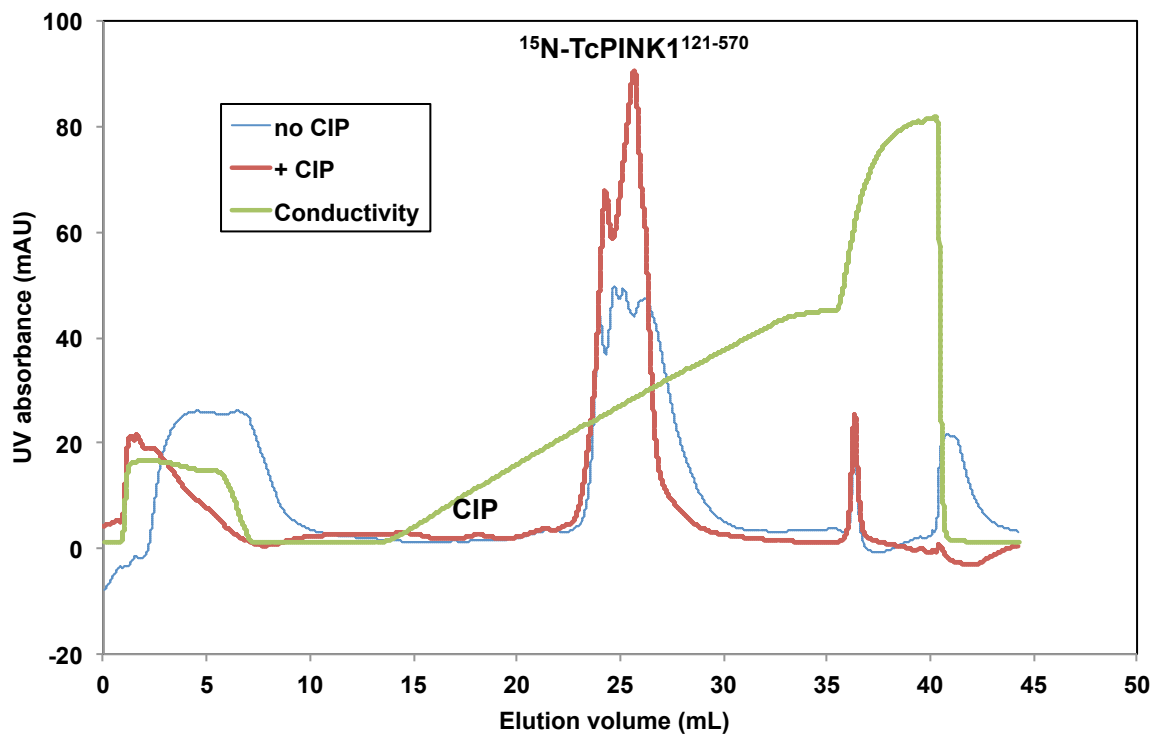

**Appendix Figure S4 - Purification of CIP-treated TcPINK1.**

$^{15}\text{N}$ -labeled TcPINK1 incubated with CIP (or not) was loaded on a monoQ 5/50 column and eluted with a 0-0.5M NaCl gradient over 20 min. CIP elutes at 17 min, whereas TcPINK1 elutes later at 25 min. Protein elution was monitored by UV at 280 nm.

**A**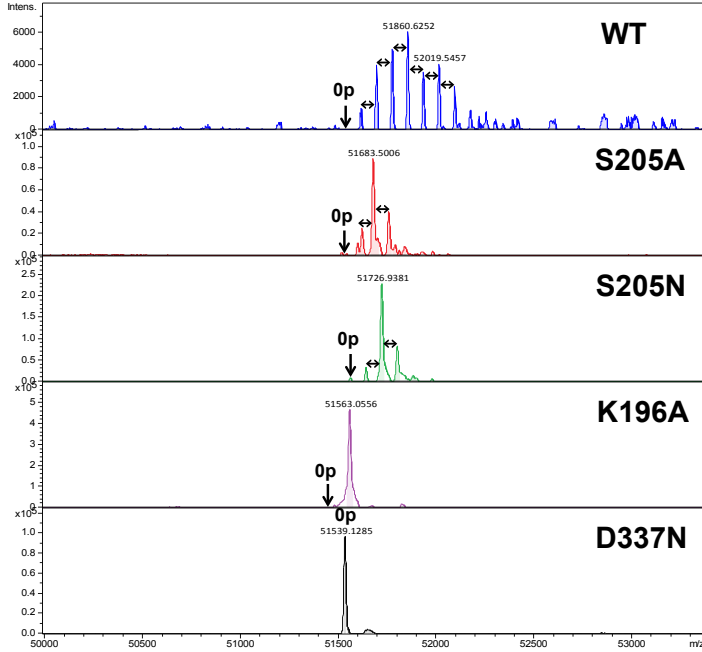**B**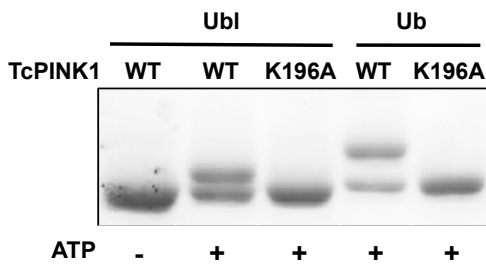**C**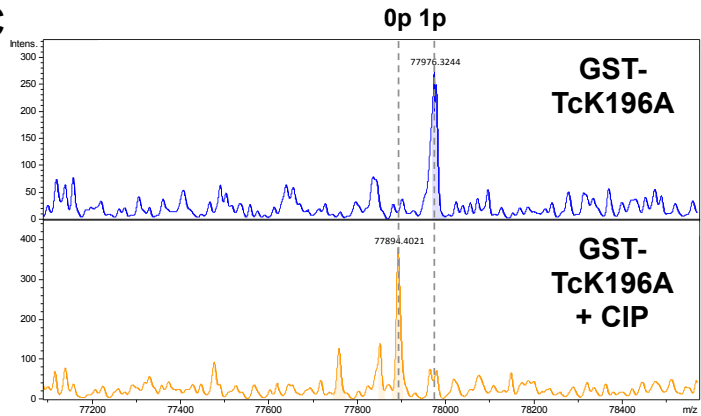

### Appendix Figure S5 - Phosphorylation analysis of TcPINK1 WT and mutants.

**A** Intact mass spectra of TcPINK1 WT and mutants expressed in *E. coli* for 20 h. The double-edged arrows on the spectra are used to indicate a difference of 80 Da (1 phosphorylation) between peaks. '0p' indicates the theoretical mass of the unphosphorylated protein.

**B** Phos-tag gels of phosphorylation assays of 30  $\mu$ M GST-tagged Ubi (5 min) or Ub (30 min) with 0.5  $\mu$ M GST-TcPINK1 WT or K196A.

**C** Intact mass spectra of GST-TcPINK1 K196A before and after 30 min CIP treatment.

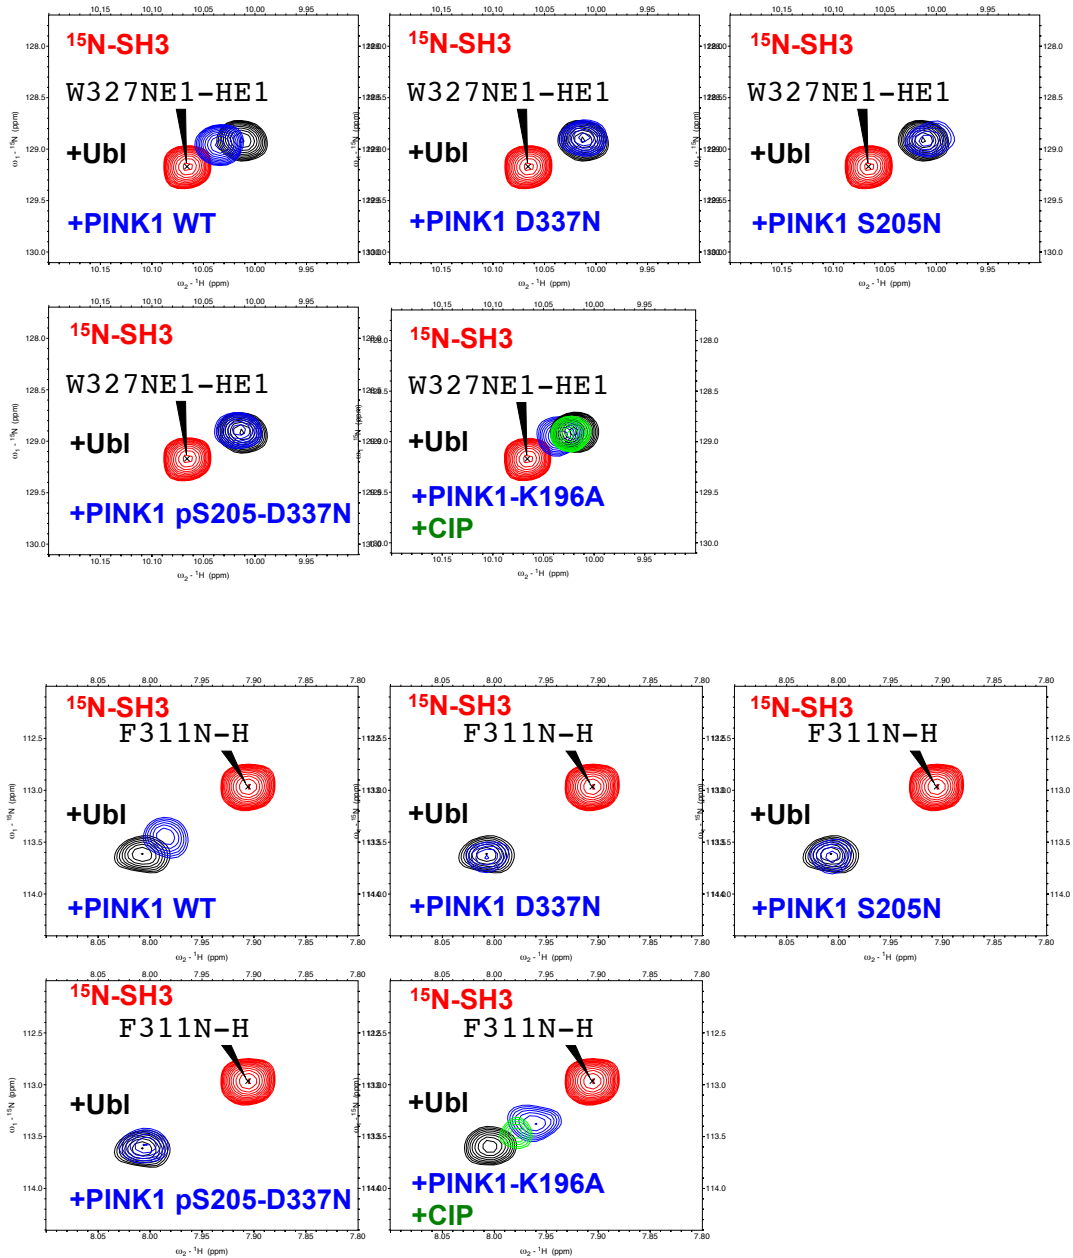

**Appendix Figure S6 - NMR competition assays of TcPINK1 mutants with  $^{15}\text{N}$ -SH3 for Ubl binding.**  $^1\text{H}$ - $^{15}\text{N}$  HSQC NMR spectra of competition assays between  $^{15}\text{N}$ -labeled Endophilin-A1 SH3 domain and different forms of GST-TcPINK1 for Ubl. The peaks represent the signals from two different peaks from the spectra of 40  $\mu\text{M}$  SH3 alone (red), following the addition of 48  $\mu\text{M}$  Ubl (black), 48  $\mu\text{M}$  Ubl and 100  $\mu\text{M}$  GST-TcPINK1 (blue), or 48  $\mu\text{M}$  Ubl, 100  $\mu\text{M}$  GST-TcPINK1 and CIP (green). The average relative chemical shifts from 9 peaks from each of these experiments was used for quantification (Fig 4C).

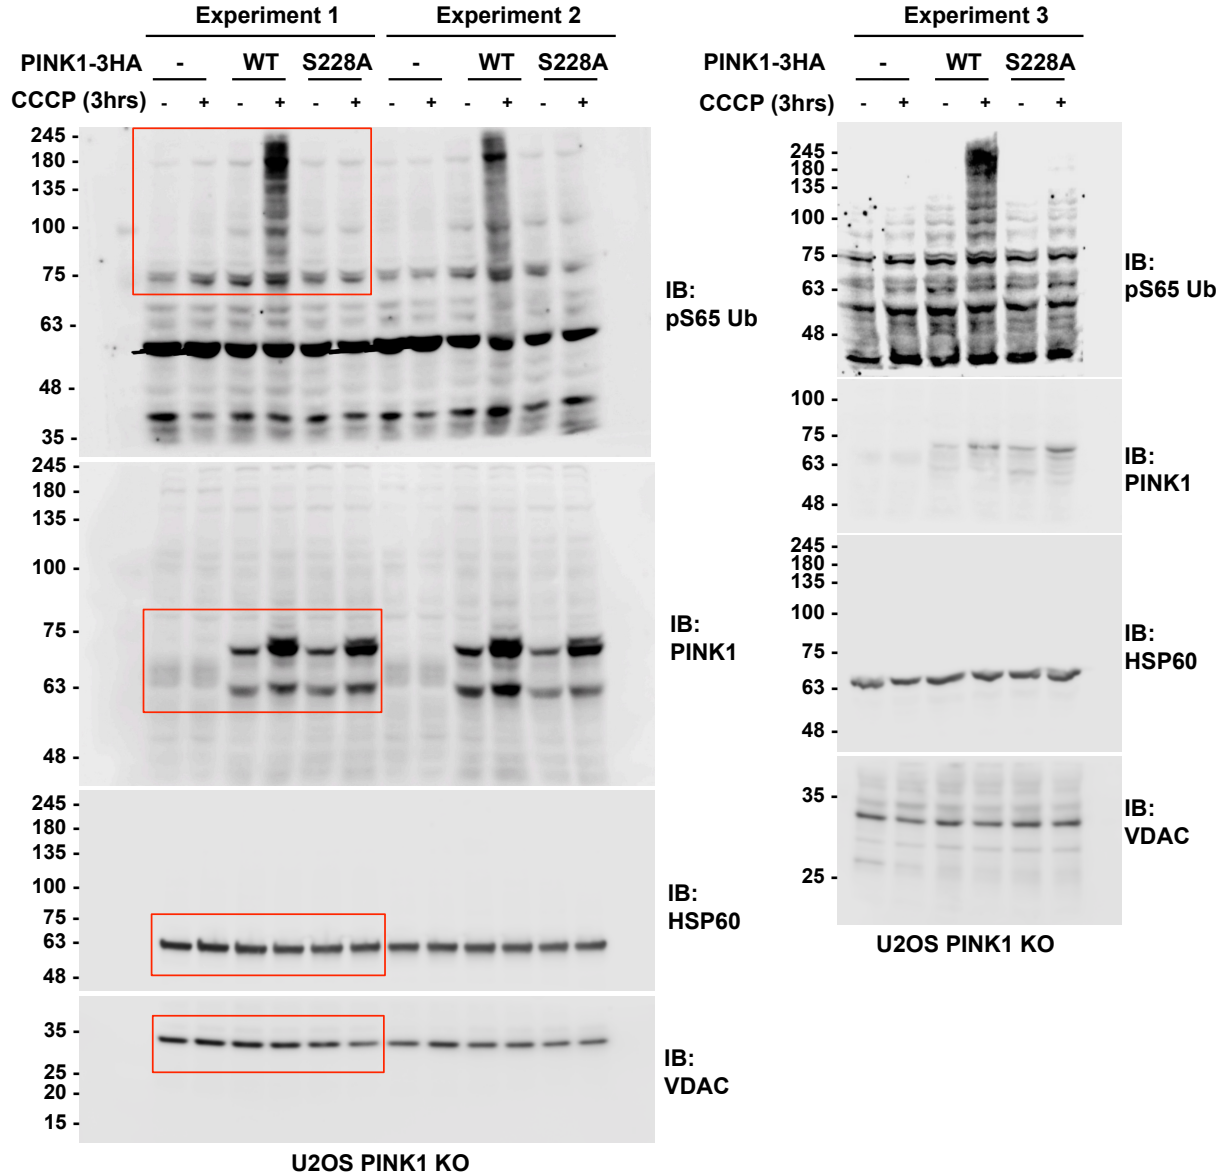

**Appendix Figure S7- Immunoblots for the experiments with U2OS cell lines**

Full immunoblots of PINK1, phospho-Ser65 Ub, HSP60 and VDAC from all 3 experimental replicates. The red squares indicate regions of the blots used in Fig 4D. The blots for phospho-Ser65 Ub and HSP60 were used for the quantification.



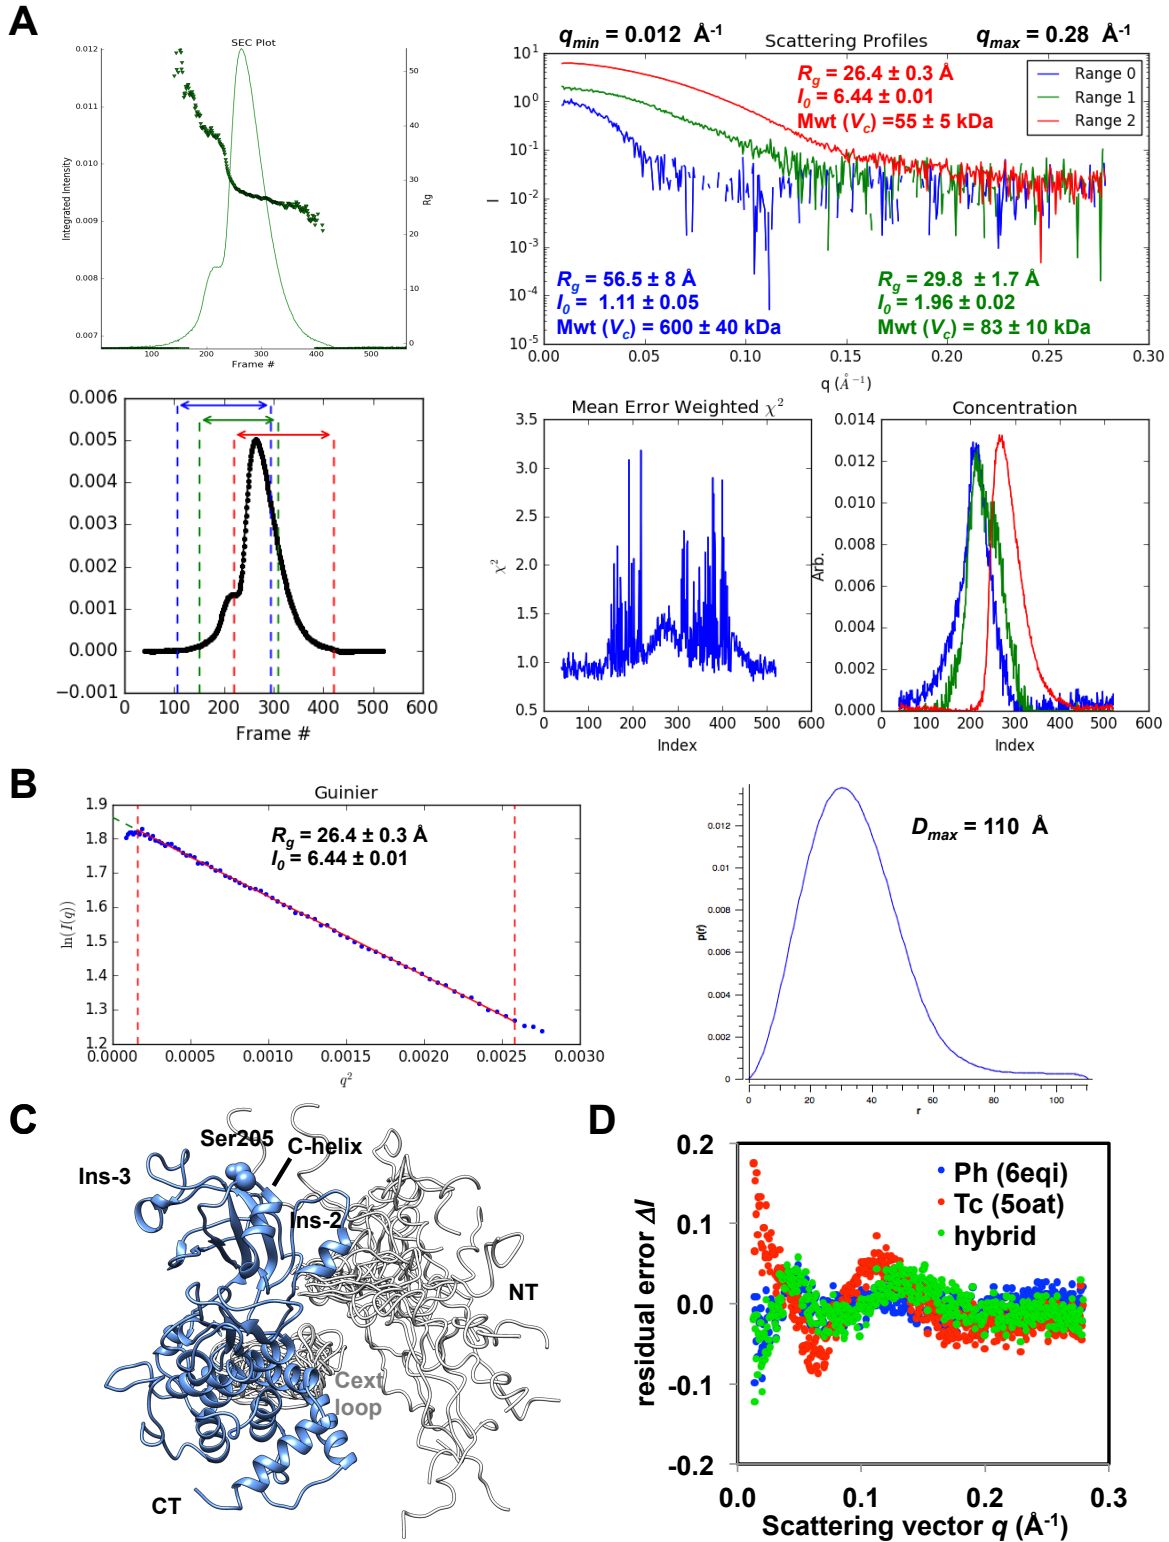

**Appendix Figure S8 - SAXS analysis and model fitting of TcPINK1<sup>121-570</sup>.**

**A** Evolving Factor Analysis (EFA) of TcPINK1<sup>121-570</sup> D337N resolved on size-exclusion chromatography coupled to SAXS. Top-left: Integrated scattering intensity plotted as function of elution volume. The green triangles correspond to the Guinier-derived  $R_g$  values. Bottom-left: EFA analysis with three components,

showing the elution volume range (index #) for each species. Top-right : scattering curves for the three EFA components, with corresponding  $R_g$  and molecular weight ( $V_c$ -derived) values. Bottom-right : Mean-error weighted  $\chi^2$  values between experimental data and the EFA model as a function of frame #, and intensity of each component.

**B** Primus-analysis of the EFA component corresponding to the monomer of TcPINK<sup>121-570</sup>. Left: Guinier analysis showing a straight line, indicating monodispersity. Right: Pair-distance distribution function, showing a symmetrical pattern characteristic of globular proteins.

**C** Ensemble of twenty TcPINK<sup>121-570</sup> models derived from the PhPINK1 crystal structure (pdb 6eqi) computed with the software CORAL, which fit best the SAXS data. The rigid-components (a.a. 151-182, 191-262, 287-515, 536-570) are colored in blue, and the flexible linkers are colored in white.

**D** Residual error for the three scattering profiles shown in Fig 5B.
